# Supplementary material for: The landscape of lncRNAs in Cydia pomonella provides insights into their signatures and potential roles in transcriptional regulation
Source: PubMed Central journal article supplement (PMC7786964; doi:10.1186/s12864-020-07313-3), 2021-01-05

### Acceptor sites

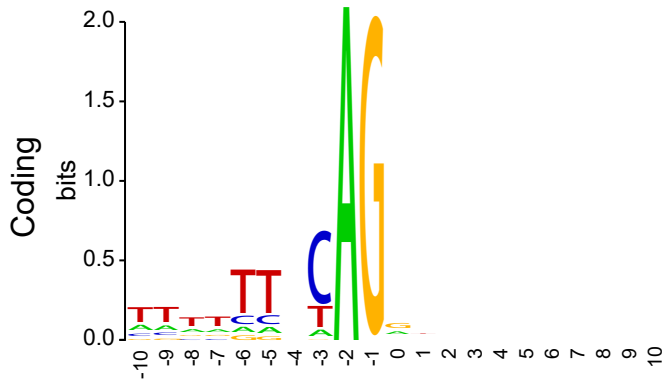

### Donor sites

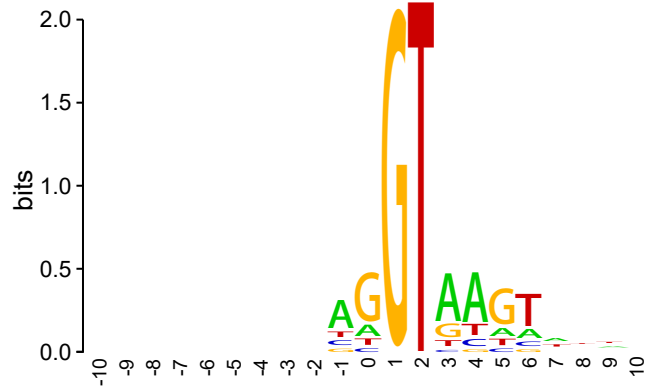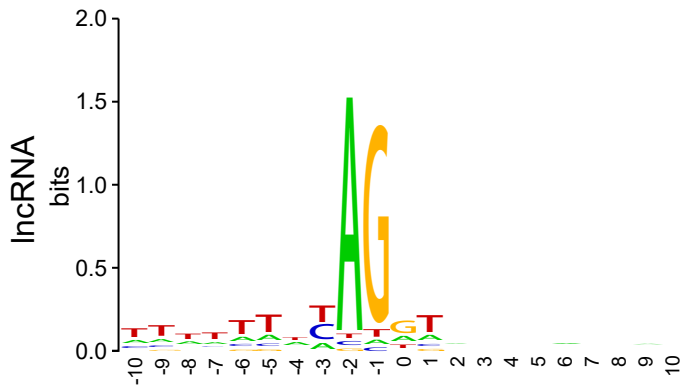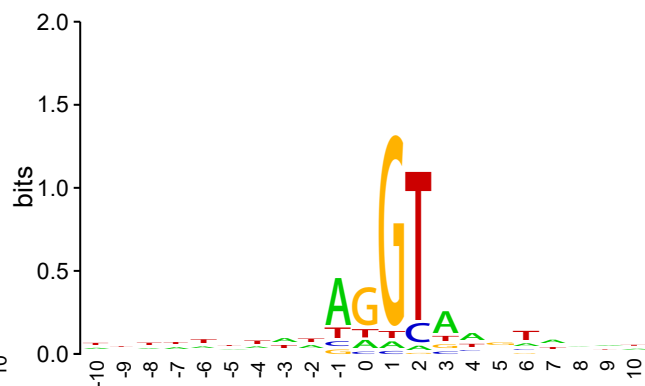

Supplement: 12864_2020_7313_MOESM10_ESM.pdf [file 12864_2020_7313_MOESM10_ESM.pdf]
