# Supplementary material for: The landscape of lncRNAs in Cydia pomonella provides insights into their signatures and potential roles in transcriptional regulation
Source: PubMed Central journal article supplement (PMC7786964; doi:10.1186/s12864-020-07313-3), 2021-01-05

Kolmogorov-Smirnov test,  $P < 2.2e-16$

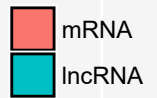

Density

4

2

0

0.4

0.6

0.8

1.0

Maximal JS specificity score

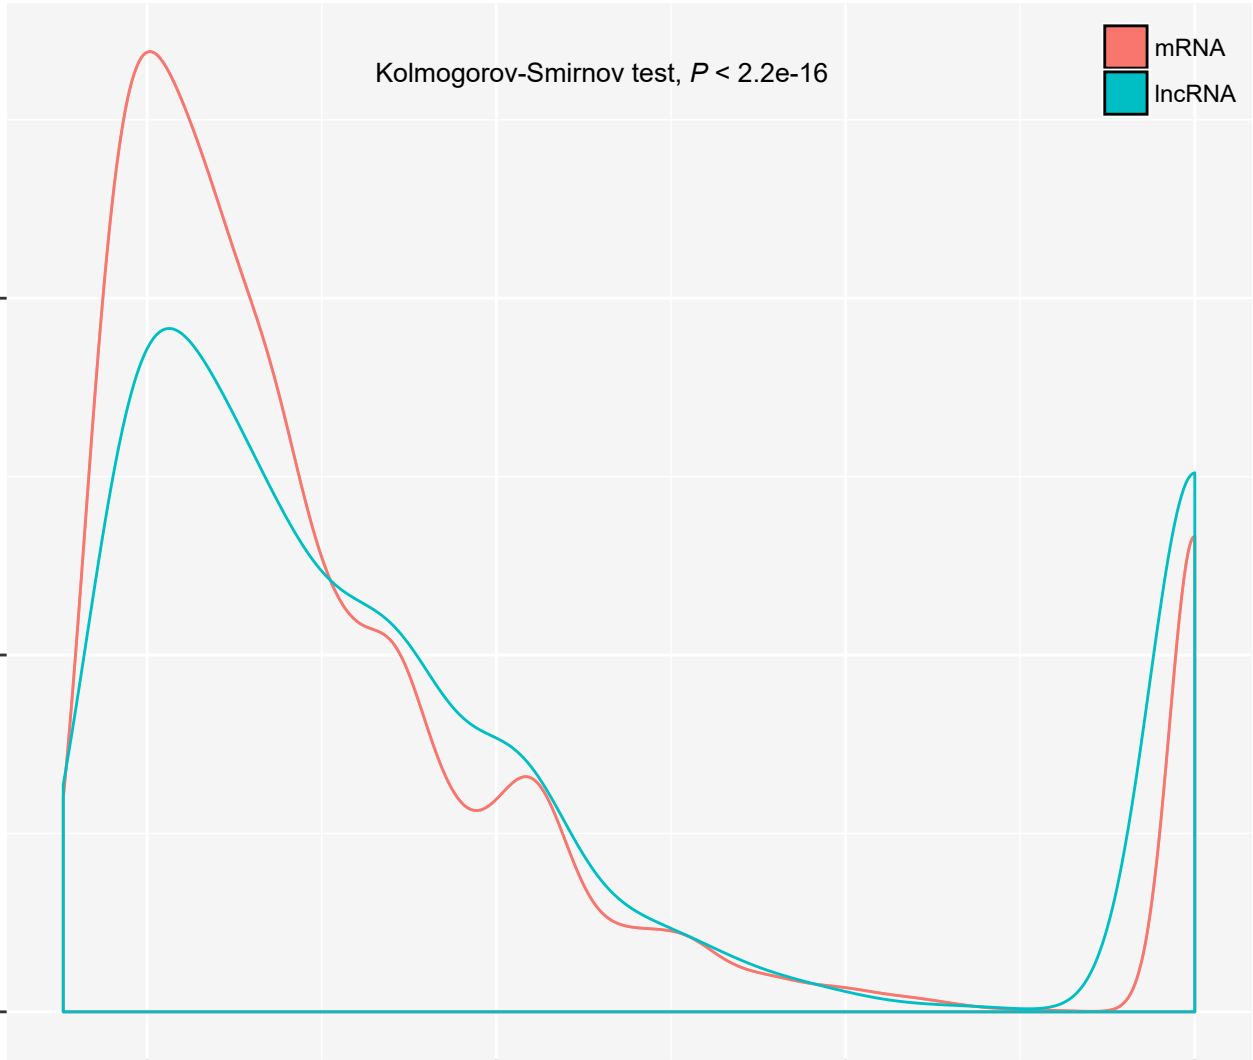

Supplement: 12864_2020_7313_MOESM12_ESM.pdf [file 12864_2020_7313_MOESM12_ESM.pdf]
